# Supplementary material for: An Investigation into the Influence of ACTG2 on Gastric Cancer Prognosis and Cellular Biological Behaviors
Source: Research Square preprint supplement (doi:10.21203/rs.3.rs-6582968/v1), 2025-06-10
Supplement: Supplementary file 1 [file 30c4f1a5b3b67f133702334b.pdf]

**ACTG2  
(45KDa)**

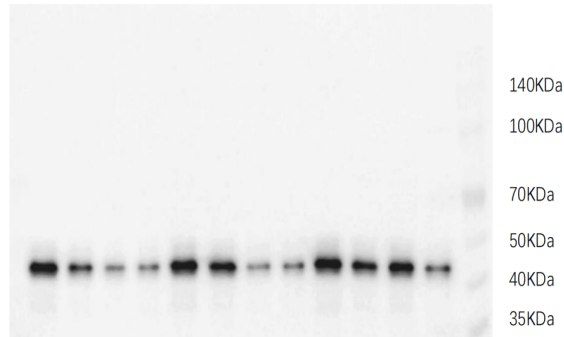

**tubulin  
(55KDa)**

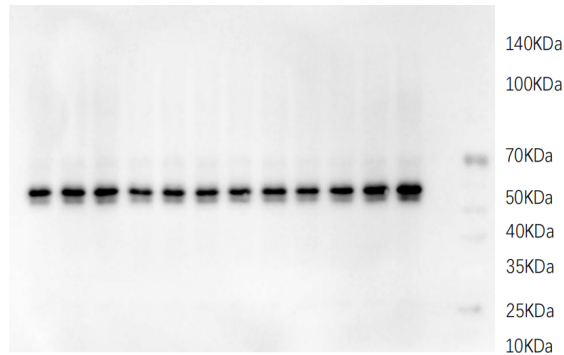

**Figure4:(B)Western Blotting were used to assess the protein expression levels of ACTG2 in human normal gastric mucosal cells(GES-1) and human GC cells(SGC7901,HGC-27,and AGS).**

**ACTG2  
(45KDa)**

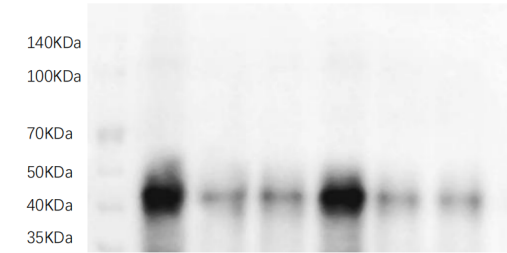

**tubulin  
(55KDa)**

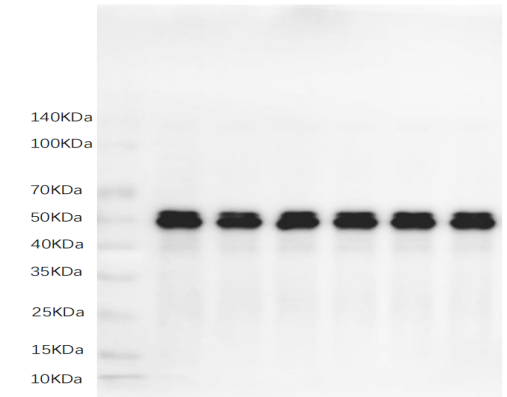

**Figure4:(E)After upregulation of ACTG2 expression,Western Blotting were performed to quantify the protein expression levels of ACTG2 in three groups of human GC cells(HGC-27).(H) Similar quantification was conducted for three groups of human GC cells(AGS) postupregulation of ACTG2 expression.**

**Note:We repeated our experiment three times and selected the most representative set of images to insert into the article.**
